# Supplementary material
Source: publisher figshare collection journal article supplement (https://frontiersin.figshare.com/ndownloader/files/25093538)
Supplement: Supplementary file [file 25093538]

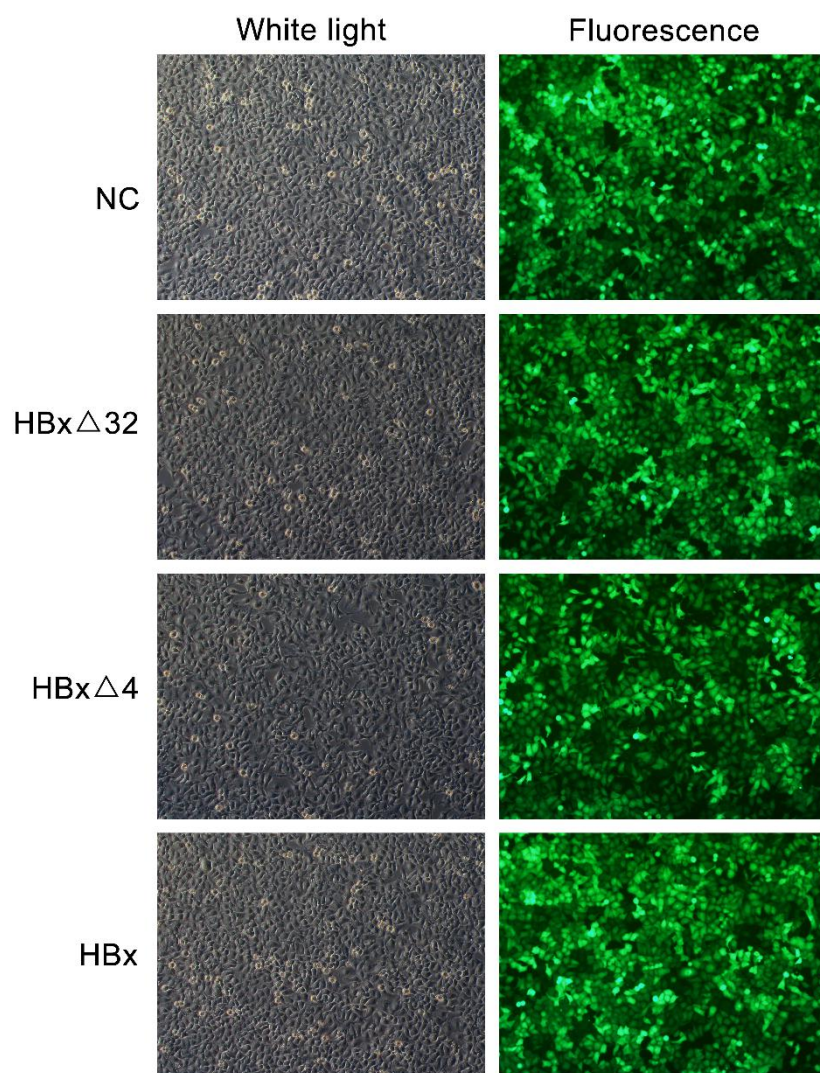

Figure 1 HepG2 cell transfection map ( $\times 100$ )

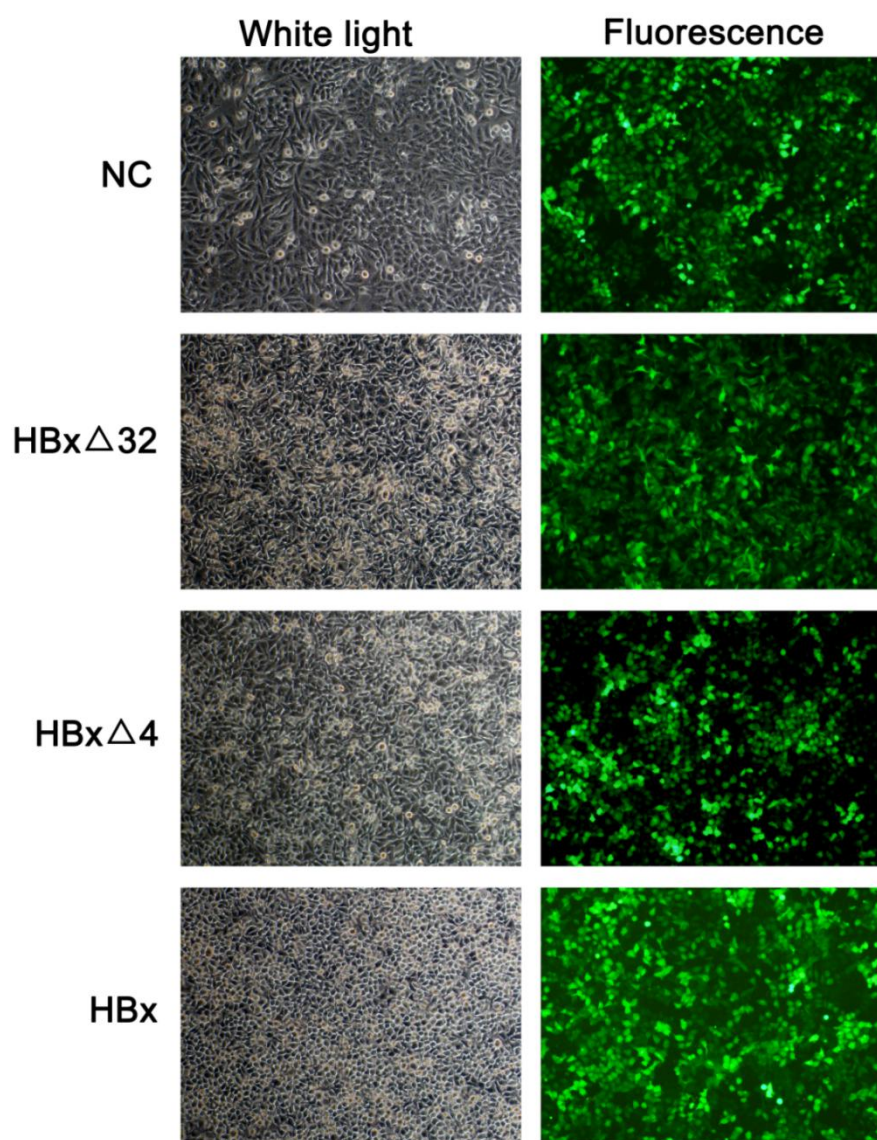

Figure 2 SMMC-7721 cell transfection map ( $\times 100$ )
